# Supplementary material for: A nanoporous organic polymer using 1, 3-dibromoadamantane as a crosslinker for adsorption/separation of benzene and cyclohexane
Source: Royal Society of Chemistry journal article supplement (doi:10.1039/d3cc05456j), 2024-01-01
Supplement: d3cc05456j1.pdf [file d3cc05456j1.pdf]

## Electronic Supplementary Information (ESI)

# Nanoporous organic polymer using 1, 3-dibromoadamantane as a crosslinker for adsorption/separation of benzene and cyclohexane

Jun Yan,<sup>\*a,b</sup> Jiangli Zhu,<sup>a,b</sup> SihanTong,<sup>a,b</sup> and Zefeng Wang<sup>\*c,d</sup>

<sup>a</sup>*School of Materials Science and Engineering, North Minzu University, Yinchuan 750021, China*

<sup>b</sup>*International Scientific and Technological Cooperation Base of Industrial Solid Waste Cyclic Utilization and Advanced Materials, Yinchuan 750021, China*

<sup>c</sup>*College of Ecology, Lishui University, Lishui 323000, China*

<sup>d</sup>*R&D Center of Green Manufacturing New Materials and Technology of Synthetic Leather Sichuan University-Lishui University, Lishui 323000, China*

Corresponding Authors:

Dr. Jun Yan; Email: yanjun2018@nun.edu.cn ;

Dr. Zefeng Wang; Email:shangk72@163.com;

## Experimental Section

### Materials

1, 3-dibromoadamantane (DBAd), hexaphenylbenzene (HPB), tetrahydrofuran (THF), dichloromethane (DCM) (99.9%, Superdry), and N, N-dimethylformamide (DMF) were purchased from J&K Chemical Co., Ltd and used as received.

### Synthesis of NOP-Ad-1

Under a flow of N<sub>2</sub>, a dry 50 ml Schlenk flask was filled with DBAd (0.88 g, 3.0 mmol), HPB (0.53 g, 1.0 mmol), AlCl<sub>3</sub> (0.95 g, 7.2 mmol), and DCM (10.0 ml). The mixture was stirred at 40°C for 12 hours. Once the reaction reached completion, the system was allowed to cool naturally to room temperature. The resulting solid was separated by filtration and sequentially washed with 1 M HCl, deionized water, DMF, DCM, and THF. Finally, the resulting solid was extracted with THF using a Soxhlet apparatus for 3 days and dried in a vacuum oven at 120°C for 48 hours, yielding 98%.

### Material characterization

The morphology of the samples was evaluated by field-emission scanning electron microscopy (FE-SEM; SUPRATM 55). The chemical structure of the synthesized polymers was characterized via Fourier transform infrared (FTIR) spectroscopy performed on a Nicolet 20XB FTIR spectrophotometer in the wavenumber range of 400-4000 cm<sup>-1</sup>. The synthesized polymers were also dispersed in KBr to form disks for capturing solid-state nuclear magnetic resonance (NMR) spectra. <sup>1</sup>H NMR spectra were collected using a 400 MHz Varian INOVA NMR spectrometer using tetramethylsilane (TMS) as an internal standard. Solid-state <sup>13</sup>C NMR spectra were recorded in conjunction with the cross-polarization (CP) and total suppression of spinning sidebands (TOSS) techniques on a Bruker AVANCE III HD 600 MHz Ascend Wide-Bore NMR spectrometer. Elemental analyses (EA) were conducted on Elementar Vario EL III. Powder Wide-angle X-ray diffractions (WAXD) data from 5° to 60° were collected using a Rigku D/max-2400 X-ray diffractometer (40 kV, 200 mA) with a copper target at a scanning rate of 2°/min. Thermogravimetric analysis (TGA) curves were recorded on a NETZSCH TG 209 thermal analyzer

by heating the samples (~8 mg) from room temperature to 800°C with a heating rate of 10°C/min under an N<sub>2</sub> atmosphere.

The C<sub>6</sub>H<sub>6</sub> and C<sub>6</sub>H<sub>12</sub> adsorption and desorption characteristics of the synthesized polymers were analyzed using an Autosorb iQ2 gas sorption analyzer (Quantachrome Instruments). Prior to testing, the polymers were degassed overnight at 100°C under high vacuum. The specific surface areas ( $S_{BET}$ ) of the synthesized polymers were calculated based on the Brunauer-Emmett-Teller (BET) model on the basis of N<sub>2</sub> adsorption and desorption isotherms obtained at 77 K. These isotherms were also subjected to analysis based on non-local density function theory (NLDFT) to determine the pore size distributions of the polymer samples. In addition, the micropore surface area ( $S_{micro}$ ) and micropore volume ( $V_{micro}$ ) were calculated by the t-plot method, and the total pore volume ( $V_{total}$ ) was determined from the N<sub>2</sub> adsorption isotherms at a relative pressure of  $P/P_0 = 0.99$ .

The adsorption separation performance of mixed gas was tested by a multi-component adsorption penetration curve analyzer. The inner diameter of the sample tube is 5 mm and the length is 20 cm. Degassing treatment before test: The sample was degassed with helium (50 mL/min) purge mode, and the sample was heated to 120°C for 2 hours. The test temperature of the sample was maintained at 298 K during the test. Helium controls the ratio series of benzene and cyclohexane as 20:80, 35:65, 50:50, 65:35, and 80:20, and the total flow rate of mixed gas is approximately 15 mL/min. The gas composition was obtained by GC test.

$$Q_{nad} = Q_{min} - Q_{nout} = q_{in} \times c_{no} \Delta T - \int_0^t [(q/(1 - \sum_1^N C_{nt}))] C_{nt} dt \quad (\text{formula 1})$$

The adsorption capacity of the adsorbent is calculated according to formula 1: Where  $Q_{nad}$  represents the adsorption capacity of the adsorbent n,  $Q_{min}$  represents the total flow rate of the adsorbent “n” entering the penetration column at  $\Delta T$ ,  $Q_{nout}$  represents the total flow rate of the adsorbent n flowing out of the penetration column at  $\Delta T$ ,  $q_{in}$  represents the total flow rate of the gas through the entrance of the penetration column,  $c_{no}$  represents the total flow rate of the gas through the exit of the penetration column,  $\Delta T$  represents the total adsorption time. “q” is the flow rate of carrier gas,  $C_{nt}$  is the concentration percentage of adsorbent at the entrance of the penetrating

column.

$$s = \left(\frac{x_1}{y_1}\right) \div \left(\frac{x_2}{y_2}\right) \quad (\text{formula 2})$$

The selectivity of gas 1 to gas 2 is calculated according to formula 2:  $X_1/Y_1$  represents the adsorption phase molar fraction of component 1 gas phase adsorption phase molar fraction,  $X_2/Y_2$  represents the adsorption phase molar fraction of component 2 gas phase adsorption phase molar fraction.

The Ideal Bz/Cy selectivity S :

$$s = \left(\frac{U_1}{y_1}\right) \div \left(\frac{U_2}{y_2}\right) \quad (\text{formula 3})$$

$$y_1 + y_2 = 1 \quad (\text{formula 4})$$

The selectivity of benzene 1 to cyclohexane 2 is calculated using formula 3. In this formula,  $U_1$  represents the benzene uptake at the adsorption phase molar fraction  $y_1$ , while  $U_2$  represents the cyclohexane uptake at the adsorption phase molar fraction  $y_2$ .

### Computational details

A first-principles electronic structure investigation of the NOP-Ad-1 fragment was conducted using the density functional theory (DFT) computational approach. Geometry optimization of the structures of NOP-Ad-1 fragment was achieved utilizing the  $\omega$ B97XD functional along with Gaussian 03 and GaussView computational packages. The geometry optimization employed a basis set of 6-311++(d, p).

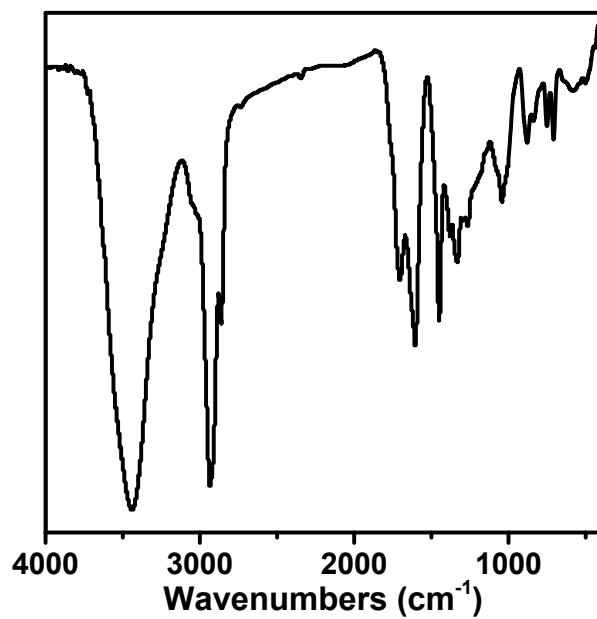

Figure S1. FTIR spectra of NOP-Ad-1.

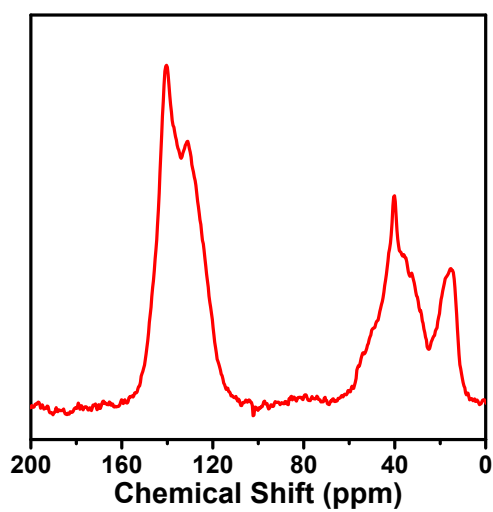

Figure S2. Solid-state <sup>13</sup>C CP/TOSS NMR spectra of NOP-Ad-1.

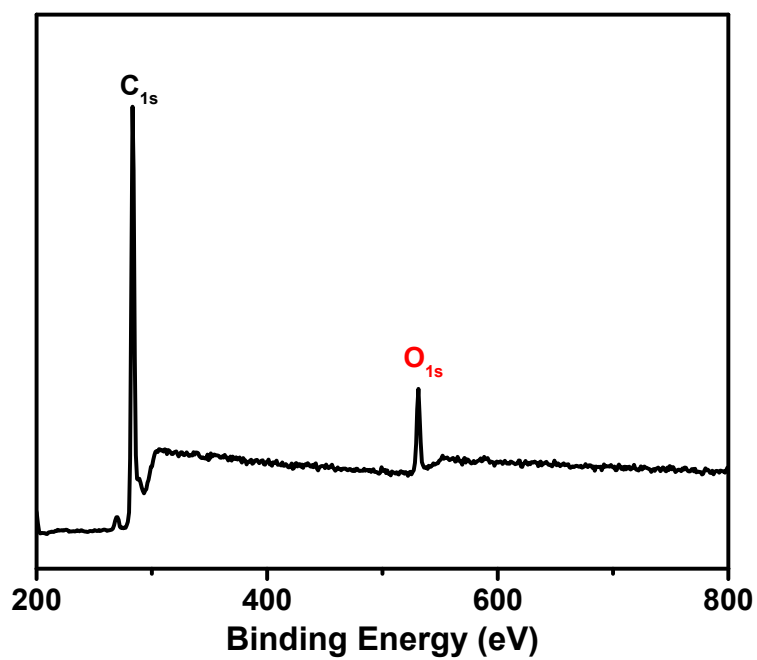

Figure S3 High resolution XPS survey spectra of NOP-Ad-1.

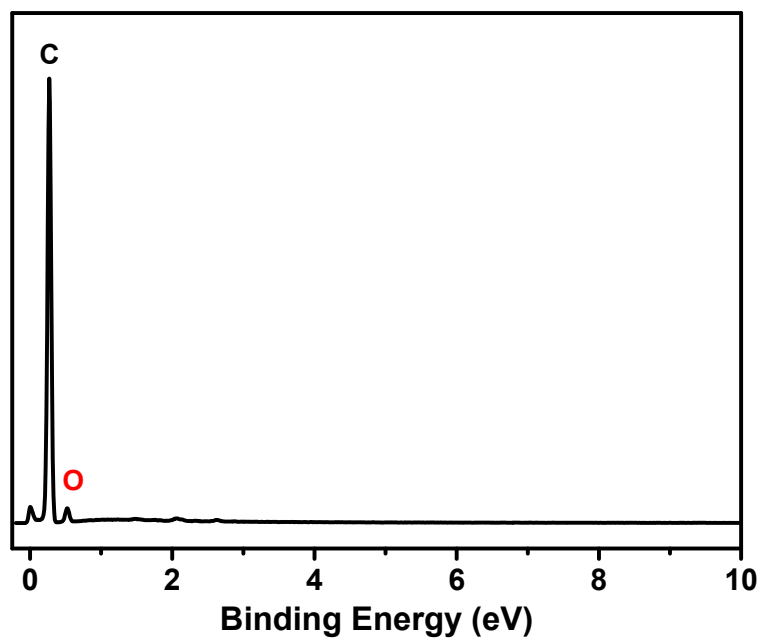

Figure S4. EDX patterns of NOP-Ad-1.

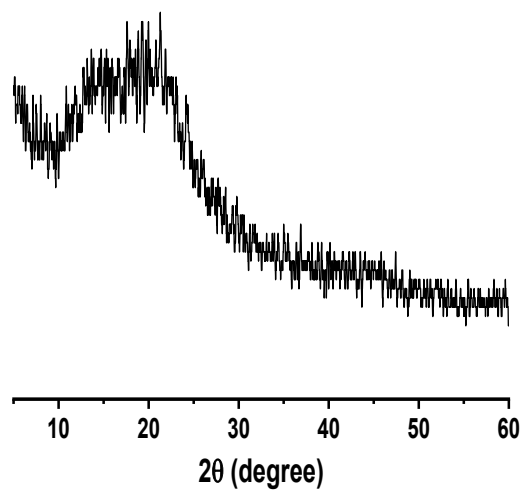

Figure S5. X-ray diffraction of NOP-Ad-1.

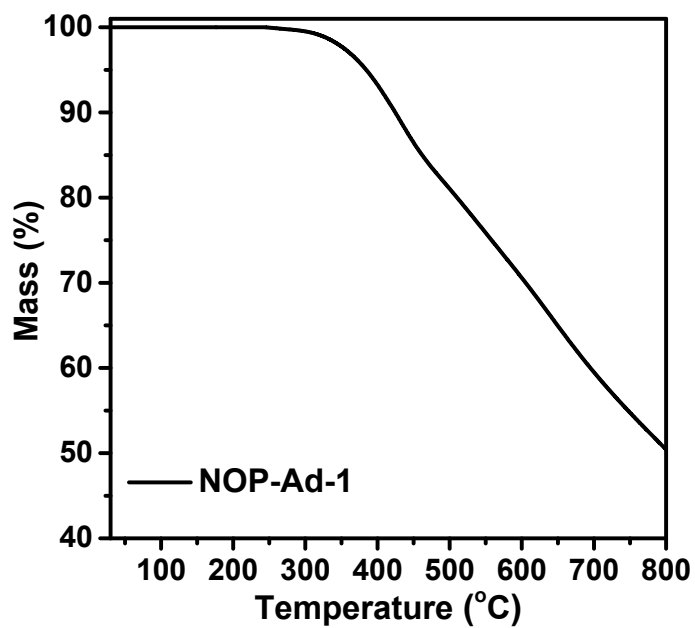

Figure S6. TGA curve of NOP-Ad-1

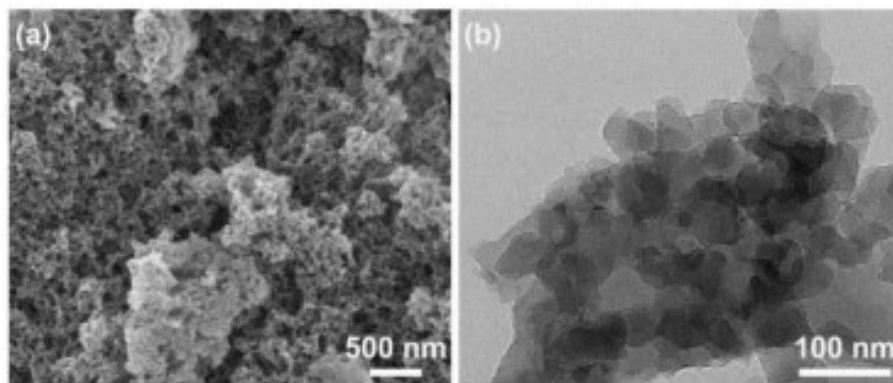

**Figure S7.** FE-SEM (a) and HR-TEM (b) images of NOP-Ad-1.

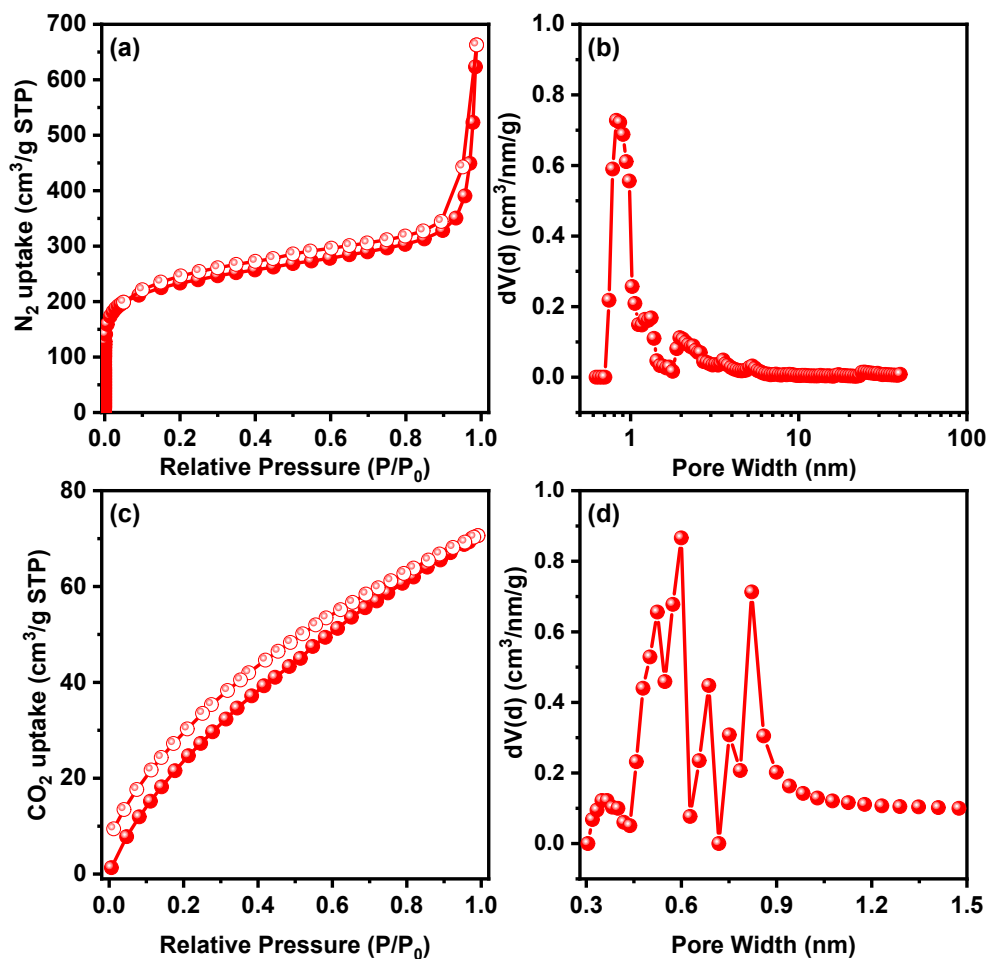

**Figure S8.** Specific surface area testing of the NOP-Ad-1: (a) N<sub>2</sub> adsorption and desorption isotherms obtained at 77 K; (b) Pore size distribution curves calculated based on NLDFT derived



from N<sub>2</sub> adsorption isotherm at 77 K; (c) CO<sub>2</sub> adsorption and desorption isotherms obtained at 273 K; (d) Pore size distribution curves calculated based on NLDFT derived from CO<sub>2</sub> adsorption isotherm at 273 K.

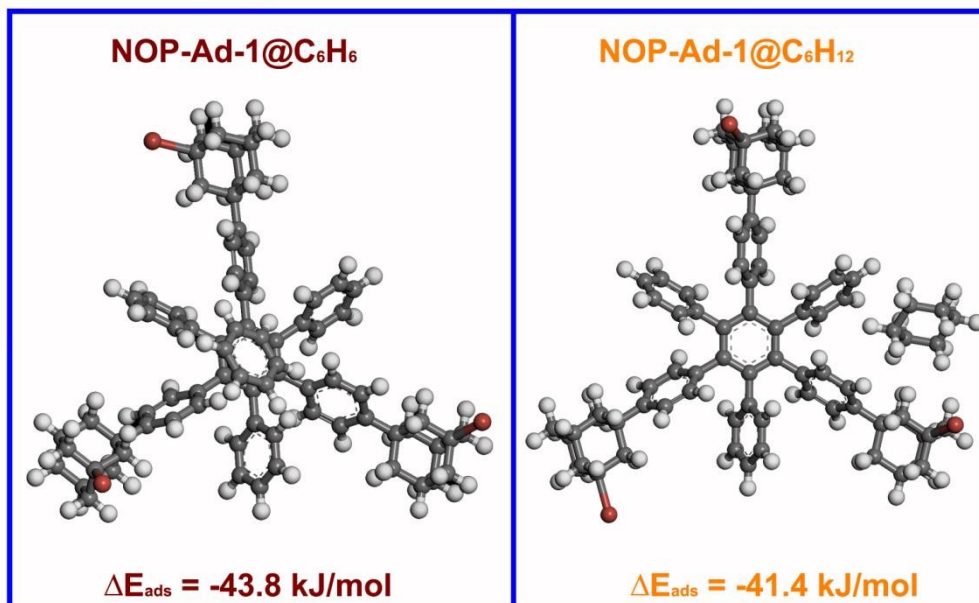

**Figure S9.** Optimized geometries of the complexes of NOP-Ad-1@C<sub>6</sub>H<sub>6</sub> and NOP-Ad-1@C<sub>6</sub>H<sub>12</sub> using Gaussian software.

**Table S1.** Comparison of uptakes of benzene and cyclohexane vapors, ideal Bz/Cy selectivity between NOP-Ad-1 and other porous materials reported in the literature.

| <b>Samples</b>        | <b>S<sub>BET</sub><br/>(m<sup>2</sup>/g)</b> | <b>Bz (mg/g)</b> | <b>Cy<br/>(mg/g)</b> | <b>Ideal Bz/Cy<br/>Selectivity</b> | <b>Ref</b>       |
|-----------------------|----------------------------------------------|------------------|----------------------|------------------------------------|------------------|
| <b>NOP-Ad-1</b>       | 857                                          | 989              | 441                  | 2.24                               | <b>This work</b> |
| <b>PAF-2</b>          | 891                                          | 138              | 7                    | 19.71                              | 1                |
| <b>Hybrid[3]arene</b> | 0.9                                          | 80.4             | 7.5                  | 10.72                              | 2                |
| <b>MALP-1</b>         | 1179                                         | 585              | 492                  | 1.19                               | 3                |
| <b>MALP-2</b>         | 1126                                         | 545              | 472                  | 1.15                               | 3                |
| <b>MALP-3</b>         | 1141                                         | 571              | 488                  | 1.17                               | 3                |
| <b>MALP-4</b>         | 1093                                         | 558              | 465                  | 1.20                               | 3                |
| <b>PAN-1</b>          | 925                                          | 726              | 527                  | 1.38                               | 4                |
| <b>PAN-2</b>          | 1242                                         | 692              | 383                  | 1.81                               | 4                |
| <b>PAN-F</b>          | 702                                          | 544              | 433                  | 1.26                               | 5                |
| <b>PAN-T</b>          | 795                                          | 570              | 518                  | 1.10                               | 5                |
| <b>CMP-S-1</b>        | 873                                          | 647.4            | 378                  | 1.71                               | 6                |
| <b>MP1</b>            | 1020                                         | 765              | 440                  | 1.74                               | 7                |
| <b>PCN-AD</b>         | 843                                          | 980              | 574                  | 1.71                               | 8                |
| <b>PBI-Ad-1</b>       | 1023                                         | 980              | 536                  | 1.83                               | 9                |
| <b>PBI-Ad-2</b>       | 926                                          | 765              | 463                  | 1.65                               | 9                |
| <b>PCN-TPC</b>        | 686                                          | 176              | 74                   | 2.38                               | 10               |
| <b>PCN-TPPC</b>       | 662                                          | 778              | 107                  | 7.27                               | 10               |
| <b>UMC-600</b>        | 1980                                         | 663              | 527                  | 1.26                               | 11               |
| <b>UMC-700</b>        | 2212                                         | 735              | 605                  | 1.21                               | 11               |
| <b>UMC-800</b>        | 2406                                         | 868              | 734                  | 1.18                               | 12               |
| <b>FJU-P6</b>         | 1066                                         | 630.4            | 313.6                | 2.01                               | 12               |
| <b>FJU-P7</b>         | 1425                                         | 768.6            | 640.4                | 1.20                               | 12               |
| <b>PCN-TA</b>         | 721                                          | 1009             | 206                  | 4.90                               | 13               |
| <b>PCN-TC</b>         | 674                                          | 867              | 244                  | 3.55                               | 13               |
| <b>PCN-DC</b>         | 393                                          | 635              | 129                  | 4.92                               | 13               |
| <b>POP-1</b>          | 486                                          | 1020             | 658                  | 1.55                               | 15               |
| <b>MPI-1</b>          | 1454                                         | 1198             | 501                  | 2.39                               | 14               |
| <b>MPI-2</b>          | 814                                          | 766              | 448                  | 1.71                               | 14               |
| <b>MPI-3</b>          | 586                                          | 549              | 415                  | 1.32                               | 14               |
| <b>sPI-1</b>          | 1108                                         | 1597             | 851                  | 1.88                               | 15               |
| <b>sPI-2</b>          | 900                                          | 1760             | 778                  | 2.26                               | 15               |
| <b>CCTF-1</b>         | 512                                          | 878              | 441                  | 1.99                               | 16               |
| <b>CCTF-2</b>         | 538                                          | 650              | 311                  | 2.09                               | 16               |
| <b>CCTF-3</b>         | 207                                          | 136              | 61                   | 2.23                               | 16               |

**Table S2.** The initial flow time, saturation adsorption uptake and selectivity of Bz and Cy based on the breakthrough curve.

| Samples  | Bz: Cy | Bz    |               | Cy    |               | Bz/Cy Selectivity |
|----------|--------|-------|---------------|-------|---------------|-------------------|
|          |        | t (s) | uptake (mg/g) | t (s) | uptake (mg/g) |                   |
| NOP-Ad-1 | 20:80  | 2970  | 45.74         | 1492  | 103.61        | 1.75              |
|          | 35:65  | 2193  | 66.20         | 1582  | 72.36         | 1.71              |
|          | 50:50  | 1815  | 96.63         | 1727  | 62.01         | 1.56              |
|          | 65:35  | 1904  | 116.82        | 1688  | 41.54         | 1.51              |
|          | 20:80  | 2517  | 145.25        | 2326  | 28.78         | 1.24              |

**Table S3.** The static adsorption uptake and ideal selectivity of Bz and Cy based on the adsorption isotherm at 298 K.

| Samples  | Relative Pressure (P/P <sub>0</sub> ) | Bz uptake (mg/g) | Cy uptake (mg/g) | Ideal Bz/Cy Selectivity |
|----------|---------------------------------------|------------------|------------------|-------------------------|
| NOP-Ad-1 | 0.20                                  | 394.2            | 280.9            | 3.76                    |
|          | 0.35                                  | 482.3            | 322.3            | 2.31                    |
|          | 0.50                                  | 560.7            | 358.5            | 1.56                    |
|          | 0.65                                  | 632.5            | 388.5            | 1.06                    |
|          | 0.80                                  | 716.3            | 419.6            | 0.64                    |

## Reference

1. H. Ren, T. Ben, E. Wang, X. Jing, M. Xue, B. Liu, Y. Cui, S. Qiu and G. Zhu, *Chem. Commun.*, 2010, **46**, 291-293.
2. J. Zhou, G. Yu, Q. Li, M. Wang and F. Huang, *J. Am. Chem. Soc.*, 2020, **142**, 2228-2232.
3. M. Rong, L. R. Yang, L. Wang, H. F. Xing, J. M. Yu, H. N. Qu and H. Z. Liu, *Ind. Eng. Chem. Res.*, 2019, **58**, 17369-17379.
4. G. Y. Li, B. Zhang, J. Yan and Z. G. Wang, *Macromolecules*, 2014, **47**, 6664-6670.
5. G. Li, B. Zhang, J. Yan and Z. Wang, *Chem. Commun.*, 2016, **52**, 1143-1146.
6. T. Chen, W. Zhang, B. Li, W. Huang, C. Lin, Y. Wu, S. Chen and H. Ma, *ACS Appl. Mater. Interfaces* 2020, **12**, 56385-56392.
7. X. Ma, Y. Wang, K. Yao, Z. Ali, Y. Han and I. Pinnau, *ACS Omega*, 2018, **3**, 15966-15974.
8. C. Shen, H. Yu and Z. Wang, *Chem. Commun.*, 2014, **50**, 11238-11241.
9. B. Zhang, G. Y. Li, J. Yan and Z. G. Wang, *J. Phys. Chem. C*, 2015, **119**, 13080-13087.
10. G. Deng and Z. Wang, *ACS Appl. Mater. Interfaces*, 2017, **9**, 41618-41627.
11. J. Yan, B. Zhang and Z. Wang, *J. Phys. Chem. C* 2017, **121**, 22753-22761.
12. L. Chen, H. Zhang, Y. Ye, Z. Yuan, J. Wang, Y. Yang, S. Lin, F. Xiang, S. Xiang and Z. Zhang, *New J. Chem.*, 2021, **45**, 22437-22443.
13. C. J. Shen, J. Yan, G. Y. Deng, B. A. Zhang and Z. G. Wang, *Polym. Chem.*, 2017, **8**, 1074-1083.
14. G. Y. Li and Z. G. Wang, *Macromolecules*, 2013, **46**, 3058-3066.
15. J. Yan, B. Zhang and Z. Wang, *Polym. Chem.*, 2016, **7**, 7295-7303.
16. J. Yan, H. Y. Sun, Q. L. Wang, L. Lu, B. Zhang, Z. G. Wang, S. W. Guo and F. L. Han, *New J. Chem.*, 2022, **46**, 7580-7587.
